# Supplementary material for: The Role of SATB1 in Breast Cancer Pathogenesis
Source: Oxford University Press journal article supplement (doi:10.1093/jnci/djq243), 2010-07-02
Supplement: djq243_Supplementary_Data.zip [file djq243_Supplementary_Data.zip]

Archive with 11 entries (11 files):
- jnci-JNCI-09-1096-s03.pdf
- jnci-JNCI-09-1096-s08.pdf
- jnci-JNCI-09-1096-s06.pdf
- jnci-JNCI-09-1096-s11.pdf
- jnci-JNCI-09-1096-s07.pdf
- jnci-JNCI-09-1096-s09.pdf
- jnci-JNCI-09-1096-s01.pdf
- jnci-JNCI-09-1096-s02.pdf
- jnci-JNCI-09-1096-s10.pdf
- jnci-JNCI-09-1096-s05.pdf
- jnci-JNCI-09-1096-s04.pdf
