# Supplementary material for: The Role of SATB1 in Breast Cancer Pathogenesis
Source: Oxford University Press journal article supplement (doi:10.1093/jnci/djq243), 2010-07-02
Supplement: djq243_Supplementary_Data.zip [file djq243_Supplementary_Data.zip › jnci-JNCI-09-1096-s04.pdf]

## SUPPLEMENTARY FIGURE 4

**A**

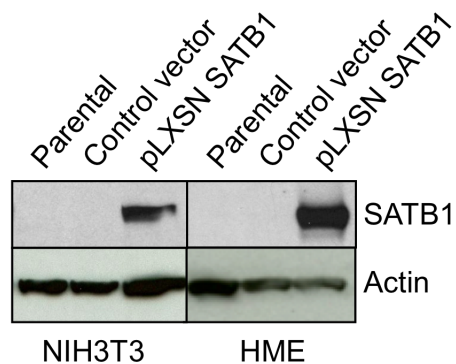

**B**

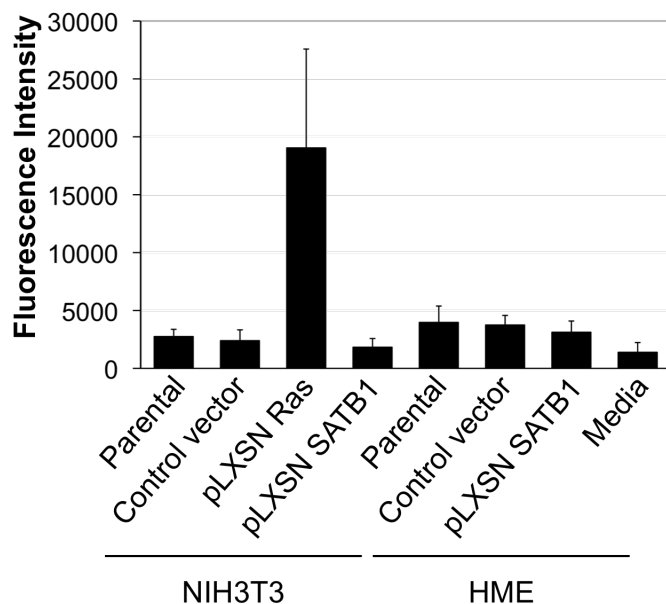

**Supplementary Figure 4. Effect of SATB1 expression on cell transformation in vitro.** For these experiments, we used NIH3T3 and HME3 pLXSN SATB1 cells that overexpress SATB1 protein, pLXSN control vector NIH3T3 and HME3 cells, and parental NIH3T3 and HME3 cells. **A)** SATB1 protein expression by immunoblot analysis. Actin protein expression was the loading control. **B)** Colony formation in soft agar after 8 days of culture. To measure colony formation, agar was solubilized, cells were lysed, and the number of cells in the colonies was assessed by use of CyQuant® GR Dye with a fluorescence plate reader. Fluorescence intensity is directly proportional to cell number. The experiment was performed twice, with triplicate samples. Error bars = 95% confidence intervals.
