# Supplementary material for: The Role of SATB1 in Breast Cancer Pathogenesis
Source: Oxford University Press journal article supplement (doi:10.1093/jnci/djq243), 2010-07-02
Supplement: djq243_Supplementary_Data.zip [file djq243_Supplementary_Data.zip › jnci-JNCI-09-1096-s05.pdf]

## SUPPLEMENTARY FIGURE 5

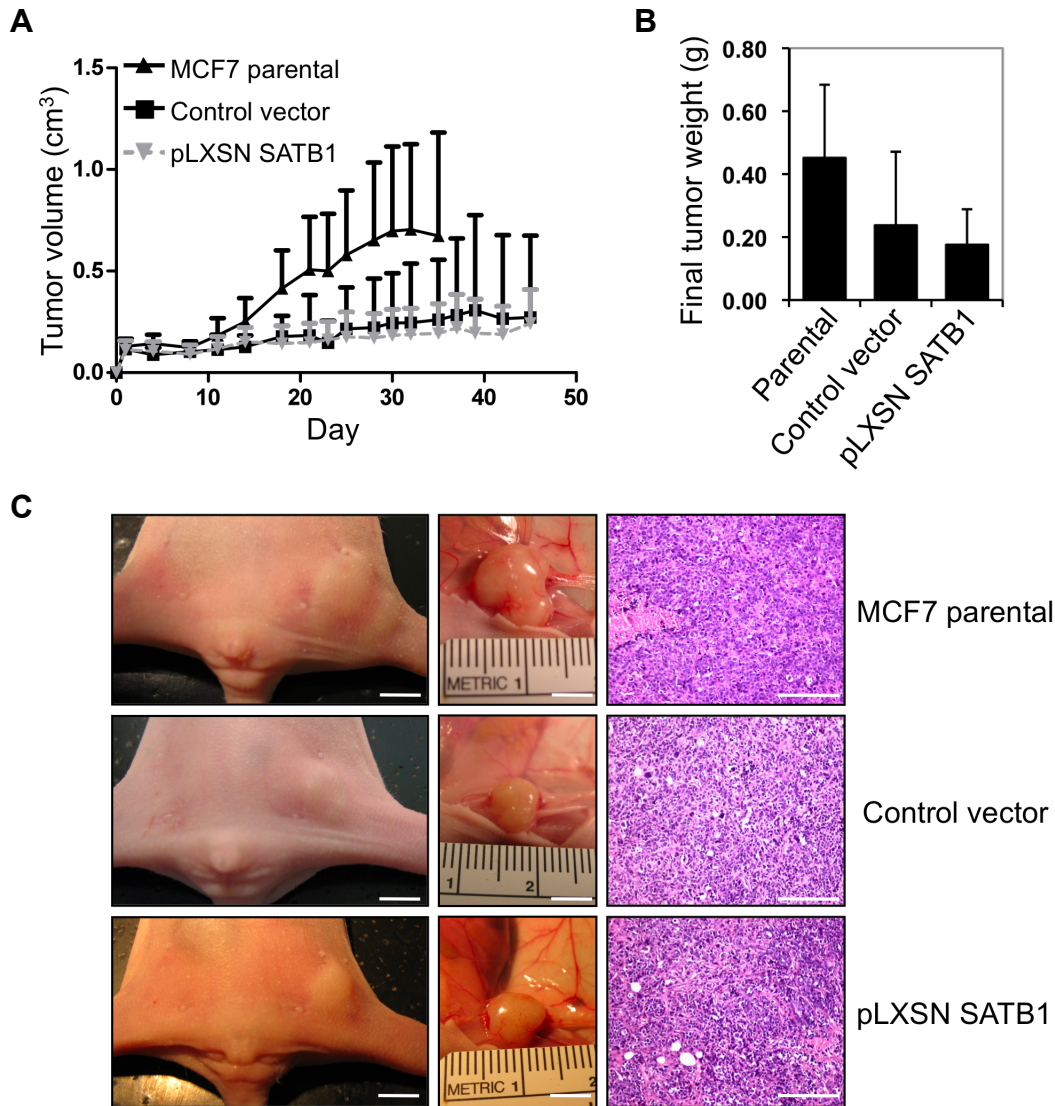

**Supplementary Figure 5. Effect of SATB1 expression on the aggressive cancer phenotype in vivo.** For these experiments, we used MCF7 pLXSN SATB1 cells that overexpress SATB1 mRNA and protein, pLXSN control vector MCF7 cells, and parental MCF7 cells. Mice (n = six mice per group) were injected with  $3 \times 10^6$  pLXSN SATB1 cells, control vector cells, or parental MCF7 cells into the fourth mammary fat pad from flank to obtain one tumor per mouse. **A)** Tumor volume. Tumors were measured with vernier calipers and volume was calculated with the formula  $L \times W^2 \times 0.4$  (where  $1 \text{ cm}^3 = 1 \text{ g}$ ). Each data point is the mean value of six tumors. Error bars = 95% confidence intervals (CIs). **B)** Final tumor weight. Tumors were removed at necropsy and weighed. Each data point is the mean value of six tumors. Error bars = 95% CIs. **C)** Photographs of representative mice (left column, scale bar = 5 mm) and tumors in their mammary fat pads (center column, scale bar = 5 mm) and micrographs of tumor sections stained with hematoxylin–eosin (right column, scale bar = 50  $\mu\text{m}$ ).
