# Supplementary material for: The Role of SATB1 in Breast Cancer Pathogenesis
Source: Oxford University Press journal article supplement (doi:10.1093/jnci/djq243), 2010-07-02
Supplement: djq243_Supplementary_Data.zip [file djq243_Supplementary_Data.zip › jnci-JNCI-09-1096-s06.pdf]

## SUPPLEMENTARY FIGURE 6

Study reference

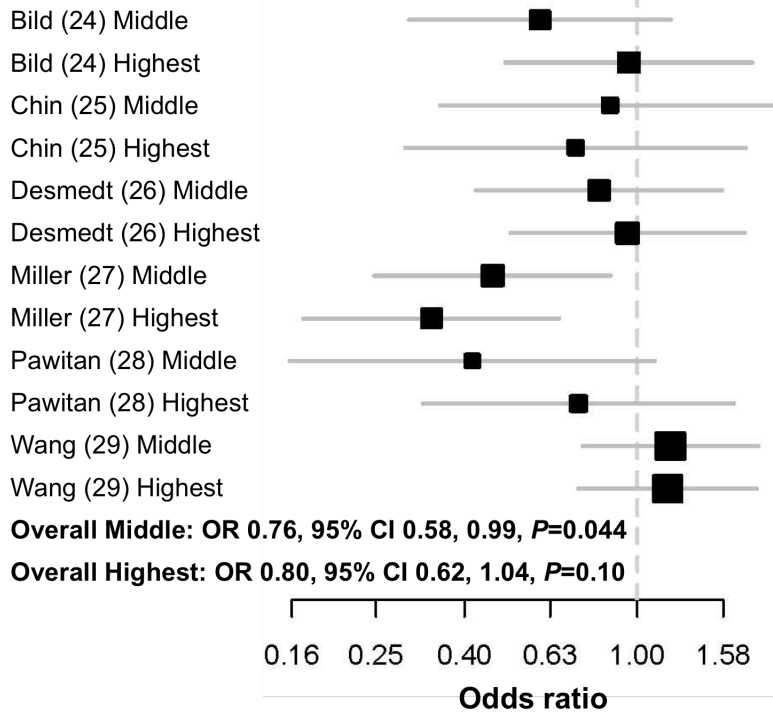

**Supplementary Figure 6. Forest plot of SATB1 expression in primary tumors from patients with breast cancer.** A Forest plot is presented for the association between SATB1 expression level in breast carcinoma tissue and overall survival of patients. Expression data from the six independent microarray studies [24-29], as described in Figure 6, were stratified by tertiles of SATB1 expression. Data from the middle or highest SATB1 expressing group, as indicated, were compared with data from the lowest SATB1 expressing group. Squares = odds ratios (size of squares indicates the sample size); whiskers = 95% confidence intervals. Odds ratios of less than 1.0 indicate increased overall survival, those equal to 1.0 indicate no effect on overall survival, and those greater than 1.0 indicate decreased overall survival. All statistical tests were two-sided.
