# Supplementary material for: The Role of SATB1 in Breast Cancer Pathogenesis
Source: Oxford University Press journal article supplement (doi:10.1093/jnci/djq243), 2010-07-02
Supplement: djq243_Supplementary_Data.zip [file djq243_Supplementary_Data.zip › jnci-JNCI-09-1096-s08.pdf]

**Supplementary Table 1.** Coding single nucleotide polymorphisms (SNPs) in the *SATB1* locus used in this analysis\*

| Region  | Contig position | mRNA position |           | dbSNP cluster ID | Function         | dbSNP allele | Protein residue [single-letter code] | Codon position | Amino acid position |
|---------|-----------------|---------------|-----------|------------------|------------------|--------------|--------------------------------------|----------------|---------------------|
|         |                 | Variant 1     | Variant 2 |                  |                  |              |                                      |                |                     |
| Exon 1  | 18402463        |               | 247       |                  | Start codon      |              |                                      |                | 1                   |
| Exon 2  | 18402353        | 1846          | 331       | rs61760908       | Synonymous       | A            | Gly [G]                              | 3              | 37                  |
|         |                 |               |           |                  | Contig reference | G            | Gly [G]                              | 3              | 37                  |
| Exon 3  | 18398486        | 2035          | 520       | rs61751589       | Synonymous       | A            | Leu [L]                              | 3              | 100                 |
|         |                 |               |           |                  | Contig reference | G            | Leu [L]                              | 3              | 100                 |
| Exon 5  | 18396697        | 2284          | 769       | rs61733671       | Missense         | C            | His [H]                              | 3              | 183                 |
|         |                 |               |           |                  | Missense         | T            | His [H]                              | 3              | 183                 |
|         |                 |               |           |                  | Contig reference | A            | Gln [Q]                              | 3              | 183                 |
| Exon 5  | 18396682        | 2299          | 784       | rs55782480       | Synonymous       | G            | Thr [T]                              | 3              | 188                 |
|         |                 |               |           |                  | Contig reference | A            | Thr [T]                              | 3              | 188                 |
| Exon 7  | 18376328        | 2571          | 1056      | rs11717113       | Missense         | G            | Gly [G]                              | 2              | 279                 |
|         |                 |               |           |                  | Contig reference | C            | Ala [A]                              | 2              | 279                 |
| Exon 8  | 18367928        | 3121          | 1606      | rs9845303        | Synonymous       | A            | Pro [P]                              | 3              | 462                 |
|         |                 |               |           |                  | Contig reference | C            | Pro [P]                              | 3              | 462                 |
| Exon 11 | 18331056        | 3637          | 2122      | rs61733672       | Synonymous       | G            | Pro [P]                              | 3              | 634                 |
|         |                 |               |           |                  | Contig reference | A            | Pro [P]                              | 3              | 634                 |

\*All gene identification information was obtained from NCBI GenBank with Genome Reference Consortium Human Build 37 (GRCh37) (reference genome build 37.1). mRNA variant 2 differs in the 5' untranslated region compared to variant 1, mRNA variants 1 and 2 encode the same SATB1 protein isoform. Heterozygosity was not determined. Contig = contiguous sequence of DNA providing a chromosome map; dbSNP = The Single Nucleotide Polymorphism Database; ID = identification number.
