# Supplementary material for: The Role of SATB1 in Breast Cancer Pathogenesis
Source: Oxford University Press journal article supplement (doi:10.1093/jnci/djq243), 2010-07-02
Supplement: djq243_Supplementary_Data.zip [file djq243_Supplementary_Data.zip › jnci-JNCI-09-1096-s09.pdf]

**Supplementary Table 2.** Microarray platforms and SATB1 probe sets for analysis of SATB1 expression in microarray datasets in Figures 5 and 6 and Supplementary Figure 6

| <b>Study</b>         | <b>Platform</b> | <b>SATB1 probe set</b> |
|----------------------|-----------------|------------------------|
| Bild et al. [24]     | U95av2          | 36899_at               |
| Chin et al. [25]     | U133A           | 203408_s_at            |
| Desmedt et al. [26]  | U133A           | 203408_s_at            |
| Huang et al. [22]    | U133A/B         | 203408_s_at            |
| Hoeflich et al. [23] | U133Plus2       | 203408_s_at            |
| Miller et al. [27]   | U133A/B         | 203408_s_at            |
| Neve et al. [21]     | U133A           | 203408_s_at            |
| Pawitan et al. [28]  | U133A/B         | 203408_s_at            |
| Wang et al. [29]     | U133A           | 203408_s_at            |
