# Supplementary material for: The Role of SATB1 in Breast Cancer Pathogenesis
Source: Oxford University Press journal article supplement (doi:10.1093/jnci/djq243), 2010-07-02
Supplement: djq243_Supplementary_Data.zip [file djq243_Supplementary_Data.zip › jnci-JNCI-09-1096-s10.pdf]

**Supplementary Table 3.** SATB1 probe sequences for analysis of SATB1 expression in microarray datasets in Figures 5 and 6 and Supplementary Figure 6\*

| Probe set   | Probe sequences           | Length of longest subsequence match to SATB2 |
|-------------|---------------------------|----------------------------------------------|
| 36899_at    | GTCTTCTCTCAGAAAACCTTTGTTG | 11                                           |
|             | CTTGCACAAACAGAAAAGTTGGAAA | 10                                           |
|             | GGATAATACAGACTGCACTAAATGT | 7                                            |
|             | AGACTGCACTAAATGTTTTCTCTG  | 9                                            |
|             | GACTGCACTAAATGTTTTCTCTGT  | 9                                            |
|             | TGTTTTACAACTGCTTGGCAGCCC  | 8                                            |
|             | AAATTTGTGTTACGGGATGCACCA  | 8                                            |
|             | TGTGTTACGGGATGCACCAAAGTG  | 8                                            |
|             | CACGGGATGCACCAAAGTGTGTACC | 8                                            |
|             | GGGATGCACCAAAGTGTGTACCCCG | 8                                            |
|             | TTTAGTTCTTATTCCGGAGCCTCA  | 8                                            |
|             | CCGGAGCCTCAAACAAGCATTATAC | 8                                            |
|             | GCATTATACCTTCTGTGATTATGAT | 10                                           |
|             | CTGTAGCACTCCCACTGATCTTTG  | 8                                            |
|             | GATCTTTGGAACTTGCCCCTTATT  | 8                                            |
|             | ATGCCTTGTATTATATGGCACTGCC | 9                                            |
| 203408_s_at | AAATGAAAAGTCCACCTTGTCTTCT | 9                                            |
|             | CAGACTGCACTAAATGTTTTCTCT  | 9                                            |
|             | GTTTTCTCTGTTTTACAACTGCT   | 8                                            |
|             | TTACAACTGCTTGGCAGCCCCAGG  | 10                                           |
|             | GCCCCAGGTGAAGCATCAAGGATTG | 8                                            |
|             | GGATGCACCAAAGTGTGTACCCCGT | 8                                            |
|             | GTGTGTACCCCGTAAGCATGAAACC | 8                                            |
|             | GTTCTTATTCCGGAGCCTCAAACAA | 8                                            |
|             | GGAGCCTCAAACAAGCATTATACCT | 8                                            |
|             | CTGTGATTATGATTTCTCTCTCTAT | 10                                           |
|             | GTAGCACTCCCACTGATCTTTGGA  | 8                                            |

\*The longest subsequence match to SATB2 of all SATB1 probes was 11 nucleotides of a total of 25 nucleotides.
