# Supplementary material for: The Role of SATB1 in Breast Cancer Pathogenesis
Source: Oxford University Press journal article supplement (doi:10.1093/jnci/djq243), 2010-07-02
Supplement: djq243_Supplementary_Data.zip [file djq243_Supplementary_Data.zip › jnci-JNCI-09-1096-s11.pdf]

**Supplementary Table 4.** SATB1-regulated genes as identified by Han et al. [1] to be involved in metastasis suppression or promotion\*

| Gene symbol | Probe_Id     | Fold change | Raw $P$ † | FDR Adj. $P$ ‡ |
|-------------|--------------|-------------|-----------|----------------|
| AREG        | ILMN_1804421 | ND          | —         | —              |
| CDH11       | ILMN_1672611 | 1.13        | .06       | .38            |
| CDH2        | ILMN_1779228 | 0.79        | .00       | .02            |
| CDH5        | ILMN_1719236 | ND          | —         | —              |
| CTGF        | ILMN_1699829 | 1.06        | .38       | .79            |
| CTGF        | ILMN_2115125 | 1.04        | .51       | .86            |
| EGFR        | ILMN_1728858 | ND          | —         | —              |
| EGFR        | ILMN_1798975 | 1.10        | .14       | .56            |
| EGFR        | ILMN_1696521 | 0.94        | .31       | .74            |
| EGFR        | ILMN_1755535 | ND          | —         | —              |
| ERBB2       | ILMN_1717902 | 0.96        | .48       | .85            |
| ERBB2       | ILMN_1728761 | ND          | —         | —              |
| ERBB2       | ILMN_2352131 | 0.90        | .10       | .49            |
| ERBB3       | ILMN_1751346 | 0.99        | .83       | .96            |
| ERBB3       | ILMN_2397602 | 1.05        | .45       | .83            |
| ERBB3       | ILMN_1737993 | 0.96        | .50       | .86            |
| ERBB4       | ILMN_1653728 | 1.08        | .22       | .67            |
| FN1         | ILMN_1778237 | ND          | —         | —              |
| FN1         | ILMN_2366463 | ND          | —         | —              |
| FN1         | ILMN_1675646 | ND          | —         | —              |
| ITGB4       | ILMN_2334210 | 1.00        | .95       | .99            |
| ITGB4       | ILMN_2253707 | ND          | —         | —              |
| ITGB4       | ILMN_1653965 | ND          | —         | —              |
| ITGB4       | ILMN_2317543 | 1.04        | .59       | .89            |
| MMP2        | ILMN_1762106 | 1.5         | .03       | .29            |
| MMP3        | ILMN_1784459 | 0.96        | .56       | .88            |
| MMP9        | ILMN_1796316 | 1.03        | .63       | .91            |
| NRG1        | ILMN_1811954 | ND          | —         | —              |
| NRG1        | ILMN_1737252 | ND          | —         | —              |
| NRG1        | ILMN_2298888 | ND          | —         | —              |
| NRG1        | ILMN_1731788 | 0.99        | .84       | .97            |
| NRG1        | ILMN_1657607 | ND          | —         | —              |
| S100A4      | ILMN_1684306 | 0.99        | .81       | .96            |
| S100A4      | ILMN_1688780 | 1.02        | .71       | .94            |
| SIP1        | ILMN_2344007 | 1.20        | .01       | .10            |
| SIP1        | ILMN_2344002 | 1.21        | .01       | .08            |
| SNAIL       | ILMN_1758086 | ND          | —         | —              |
| TGFB1       | ILMN_2129668 | ND          | —         | —              |
| VEGFB       | ILMN_1772274 | ND          | —         | —              |
| VEGFB       | ILMN_1801814 | 0.98        | .69       | .93            |
| VEGFB       | ILMN_1722855 | 0.97        | .65       | .92            |
| VEGFB       | ILMN_1726981 | 0.95        | .39       | .80            |

|     |              |      |     |     |
|-----|--------------|------|-----|-----|
| VIM | ILMN_1782538 | 1.03 | .60 | .90 |
| VIM | ILMN_2058251 | 1.07 | .27 | .71 |

\*Fold change is the ratio of expression values from control vector MCF7 cells to pLXSN SATB1 MCF7 cells on a linear scale. Adjusted *P* values were adjusted for the false discovery rate by the R limma package [17]. Expression was determined by microarray analysis with the Illumina platform HumanWG-6. ND = not detected at detection a *P* value of less than .1; adj. = adjusted; ID = identification number.† Empirical Bayes analysis. All statistical tests are two-sided. ‡ FDR-adjusted empirical Bayes analysis.
